# Supplementary material
Source: MDPI journal article supplement (https://www.mdpi.com/2073-4441/13/13/1734)
Supplement: s1 [file s1]

# Supplementary material

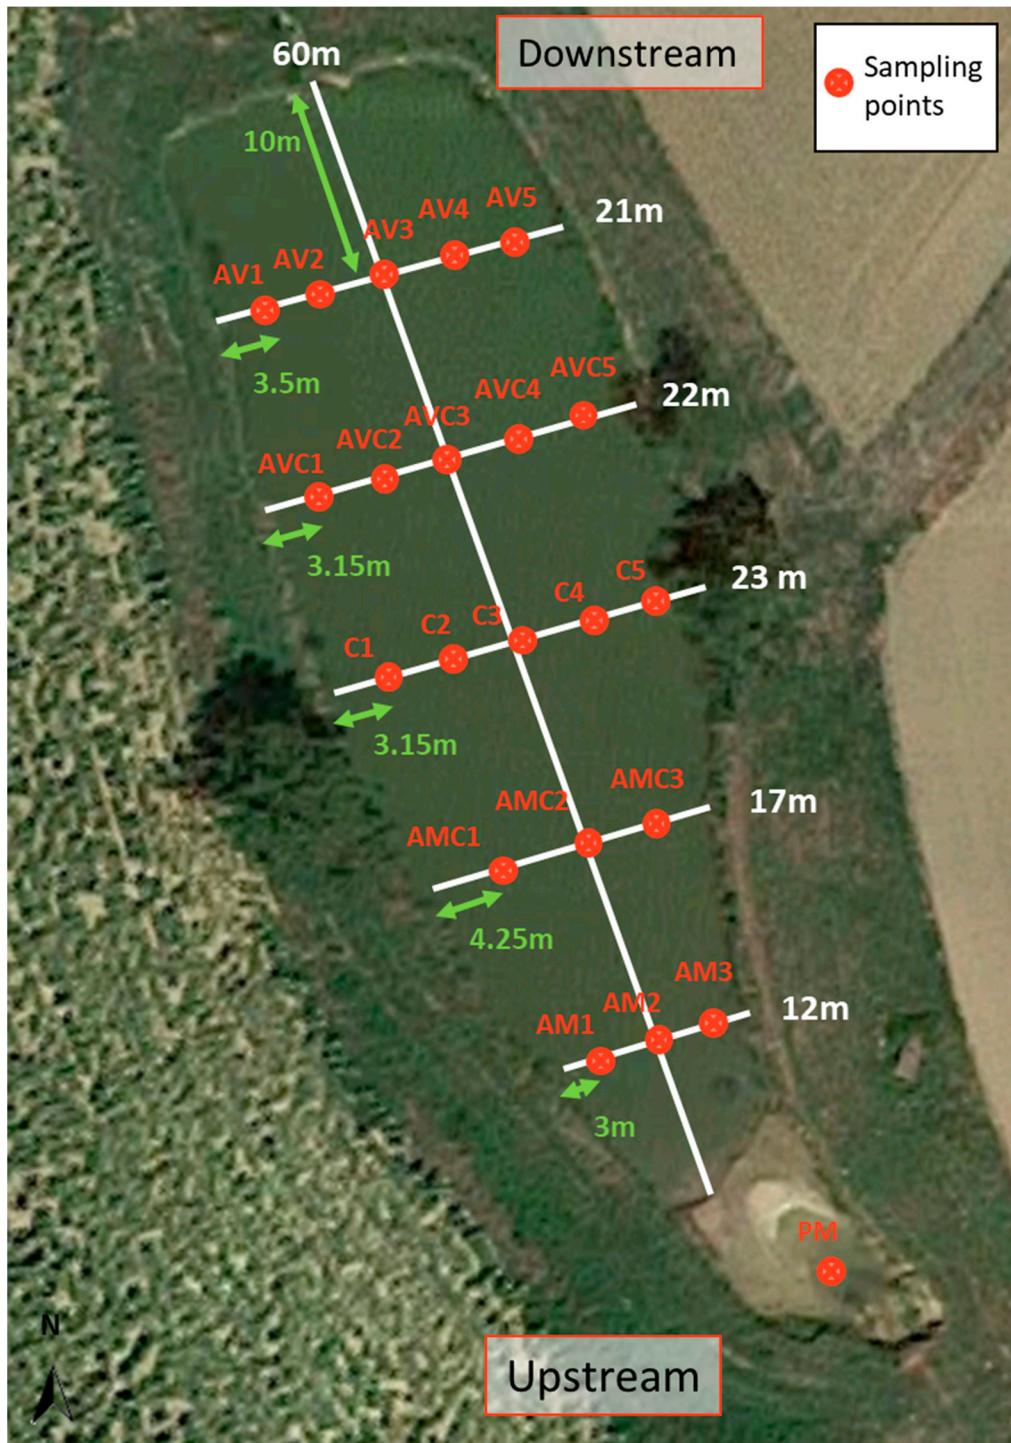

Figure S1: Dimensions of the Bassioué pond (map from Google map) and sampling points for the autumn campaign (November 2018)

Table S1: Pesticide concentrations in  $\mu\text{g.kg}^{-1}$  in the pond sediments for both campaigns (Autumn and summer)

|                  | Site | metolachlor | boscalid | epoxyconazole | tebuconazole | aclonifen | pendimethaline |
|------------------|------|-------------|----------|---------------|--------------|-----------|----------------|
| Autumn           | PM   | 1.90        | 5.21     | 2.73          | 7.51         | 0.31      | 0.20           |
|                  | AM2  | 2.21        | 5.18     | 2.14          | 7.56         | 0.25      | 0.16           |
|                  | AMC1 | 2.46        | 5.52     | 2.48          | 10.57        | 0.37      | 0.15           |
|                  | AMC2 | 2.67        | 6.46     | 2.83          | 9.87         | 0.33      | 0.19           |
|                  | AMC3 | 2.52        | 5.78     | 2.58          | 10.13        | 0.34      | 0.17           |
|                  | C1   | 2.70        | 4.65     | 2.12          | 11.26        | 0.22      | 0.17           |
|                  | C3   | 3.70        | 5.82     | 2.62          | 7.15         | 0.34      | 0.19           |
|                  | C5   | 2.96        | 4.30     | 1.76          | 8.49         | 0.18      | 0.19           |
|                  | AVC1 | 2.16        | 4.01     | 1.83          | 12.19        | 0.22      | 0.16           |
|                  | AVC3 | 3.13        | 6.25     | 2.95          | 6.56         | 0.38      | 0.21           |
|                  | AVC5 | 3.07        | 5.22     | 2.46          | 10.04        | 0.33      | 0.16           |
|                  | AV1  | 1.19        | 4.72     | 1.54          | 7.47         | 0.17      | 0.13           |
|                  | AV3  | 3.76        | 6.24     | 2.95          | 5.86         | 0.35      | 0.19           |
|                  | AV5  | 2.45        | 7.68     | 1.99          | 9.75         | 0.23      | 0.15           |
| Summer - Surface | PM   | 0.61        | 2.87     | 2.17          | 7.39         | 0.75      | 0.68           |
|                  | AM2  | 1.06        | 3.41     | 2.38          | 24.65        | 0.68      | 0.72           |
|                  | C1   | 1.33        | 3.45     | 2.19          | 24.12        | 0.70      | 0.70           |
|                  | C3   | 1.71        | 3.33     | 2.85          | 27.36        | 0.81      | 0.72           |
|                  | C5   | 1.43        | 3.46     | 2.08          | 24.68        | 0.69      | 0.70           |
|                  | AV1  | 1.21        | 2.66     | 1.53          | 28.15        | 0.57      | 0.68           |
|                  | AV3  | 1.64        | 3.54     | 2.79          | 23.08        | 0.87      | 0.70           |
|                  | AV5  | 1.39        | 3.30     | 2.20          | 13.88        | 0.82      | 0.68           |
| Summer - Depth   | PM   | 0.68        | 18.71    | 2.20          | 2.35         | 1.09      | 0.63           |
|                  | AM2  | 5.36        | 12.74    | 4.33          | 8.93         | 0.69      | 0.64           |
|                  | C1   | 3.40        | 10.29    | 2.87          | 10.93        | 0.70      | 0.63           |
|                  | C3   | 3.95        | 9.44     | 2.87          | 9.34         | 0.71      | 0.64           |
|                  | C5   | 4.07        | 9.61     | 3.05          | 10.72        | 0.79      | 0.68           |
|                  | AV1  | 3.46        | 6.92     | 2.22          | 9.00         | 0.74      | 0.68           |
|                  | AV3  | 4.19        | 10.06    | 3.02          | 8.17         | 0.79      | 0.65           |
|                  | AV5  | 4.01        | 8.73     | 3.04          | 6.59         | 0.80      | 0.66           |

Table S2: Sediment physico-chemical characteristics

| Season           | Site | Clay (%) | Fine silt (%) | Coarse silt (%) | Sand (%) | Gravel (%) | POC (mg.g <sup>-1</sup> ) | C/N |
|------------------|------|----------|---------------|-----------------|----------|------------|---------------------------|-----|
| Autumn - Surface | PM   | 9.6      | 57.3          | 17.7            | 14.6     | 0.8        | 11.6                      | 6.4 |
|                  | AM1  | 11.7     | 63.7          | 14.4            | 8.3      | 1.8        | 10.5                      | 5.8 |
|                  | AM2  | 9.4      | 61.3          | 17.4            | 11.4     | 0.4        | 9.8                       | 5.6 |
|                  | AM3  | 11.5     | 66.1          | 16.3            | 6.0      | 0.3        | 11.0                      | 5.6 |
|                  | AMC1 | 14.5     | 73.5          | 10.0            | 2.0      | 0.0        | 11.9                      | 5.6 |
|                  | AMC2 | 16.8     | 72.0          | 10.1            | 1.1      | 0.0        | 11.3                      | 5.5 |
|                  | AMC3 | 13.7     | 73.7          | 9.4             | 3.0      | 0.2        | 11.6                      | 5.4 |
|                  | C1   | 11.5     | 77.0          | 9.3             | 2.1      | 0.1        | 11.7                      | 5.3 |
|                  | C2   | 15.5     | 76.4          | 6.5             | 1.4      | 0.2        | 10.6                      | 5.3 |
|                  | C3   | 15.6     | 75.7          | 7.1             | 1.5      | 0.1        | 10.1                      | 5.8 |
|                  | C4   | 16.6     | 75.5          | 6.1             | 1.7      | 0.1        | 10.8                      | 5.2 |
|                  | C5   | 11.7     | 80.9          | 6.3             | 1.2      | 0.0        | 11.2                      | 5.2 |
|                  | AVC1 | 15.0     | 77.1          | 7.4             | 0.5      | 0.0        | 13.5                      | 5.2 |
|                  | AVC2 | 16.4     | 76.6          | 6.0             | 1.0      | 0.2        | 11.3                      | 5.5 |
|                  | AVC3 | 20.3     | 71.5          | 5.1             | 2.7      | 0.4        | 10.5                      | 5.1 |
|                  | AVC4 | 18.7     | 72.9          | 5.3             | 2.5      | 0.5        | 10.5                      | 5.7 |
|                  | AVC5 | 16.7     | 76.9          | 5.9             | 0.5      | 0.0        | 10.6                      | 5.3 |
|                  | AV1  | 16.6     | 59.5          | 17.2            | 6.7      | 0.0        | 13.1                      | 5.5 |
|                  | AV2  | 17.5     | 77.2          | 4.3             | 0.8      | 0.2        | 11.2                      | 4.9 |
|                  | AV3  | 17.1     | 75.5          | 5.2             | 1.8      | 0.4        | 11.1                      | 5.0 |
|                  | AV4  | 17.6     | 74.7          | 5.4             | 1.9      | 0.4        | 10.7                      | 5.0 |
|                  | AV5  | 13.8     | 79.4          | 6.4             | 0.4      | 0.0        | 12.3                      | 4.8 |
| Summer -Surface  | PM   | 9.7      | 65.1          | 17.5            | 7.2      | 0.5        | 9.2                       | 7.8 |
|                  | AM2  | 7.6      | 65.6          | 17.5            | 6.8      | 2.5        | 7.6                       | 6.4 |
|                  | C1   | 11.8     | 78.5          | 7.8             | 1.7      | 0.3        | 11.9                      | 6.1 |
|                  | C3   | 11.0     | 81.0          | 6.0             | 1.7      | 0.3        | 11.1                      | 6.6 |
|                  | C5   | 11.3     | 82.4          | 4.1             | 1.7      | 0.5        | 11.5                      | 7.0 |
|                  | AV1  | 12.1     | 73.8          | 6.2             | 4.7      | 3.2        | 12.3                      | 6.0 |
|                  | AV3  | 13.7     | 80.8          | 3.8             | 1.1      | 0.6        | 11.8                      | 6.3 |
|                  | AV5  | 14.7     | 80.9          | 4.2             | 0.2      | 0.0        | 11.3                      | 6.2 |
| Summer -Middle   | PM   | 2.4      | 15.6          | 4.7             | 3.0      | 74.4       | 9.3                       | 7.4 |
|                  | AM2  | 14.4     | 79.6          | 5.1             | 1.0      | 0.0        | 11.1                      | 7.1 |
|                  | C1   | 13.0     | 75.0          | 8.7             | 2.9      | 0.4        | 12.6                      | 6.9 |
|                  | C3   | 13.9     | 72.7          | 10.1            | 3.2      | 0.1        | 11.3                      | 7.2 |
|                  | C5   | 14.4     | 79.6          | 5.1             | 1.0      | 0.0        | 12.8                      | 6.6 |
|                  | AV1  | 12.3     | 73.4          | 9.4             | 4.5      | 0.5        | 12.8                      | 6.4 |
|                  | AV3  | 16.0     | 74.0          | 7.0             | 2.3      | 0.7        | 11.7                      | 6.8 |
|                  | AV5  | 12.8     | 81.7          | 5.1             | 0.3      | 0.0        | 12.2                      | 6.8 |
| Summer - Depth   | PM   | 3.2      | 15.9          | 3.2             | 4.8      | 72.8       | 6.8                       | 6.3 |
|                  | AM2  | 17.4     | 58.3          | 10.6            | 12.5     | 1.2        | 9.4                       | 6.3 |
|                  | C1   | 19.0     | 64.4          | 9.2             | 6.7      | 0.7        | 9.2                       | 6.0 |
|                  | C3   | 19.9     | 65.6          | 9.9             | 3.1      | 1.5        | 8.9                       | 5.9 |
|                  | C5   | 17.9     | 71.1          | 7.2             | 3.4      | 0.5        | 9.2                       | 5.6 |
|                  | AV1  | 19.1     | 71.3          | 7.7             | 1.8      | 0.1        | 10.2                      | 5.9 |
|                  | AV3  | 20.4     | 67.3          | 7.2             | 3.8      | 1.3        | 8.8                       | 5.5 |
|                  | AV5  | 20.9     | 69.5          | 6.8             | 2.7      | 0.1        | 9.0                       | 5.5 |

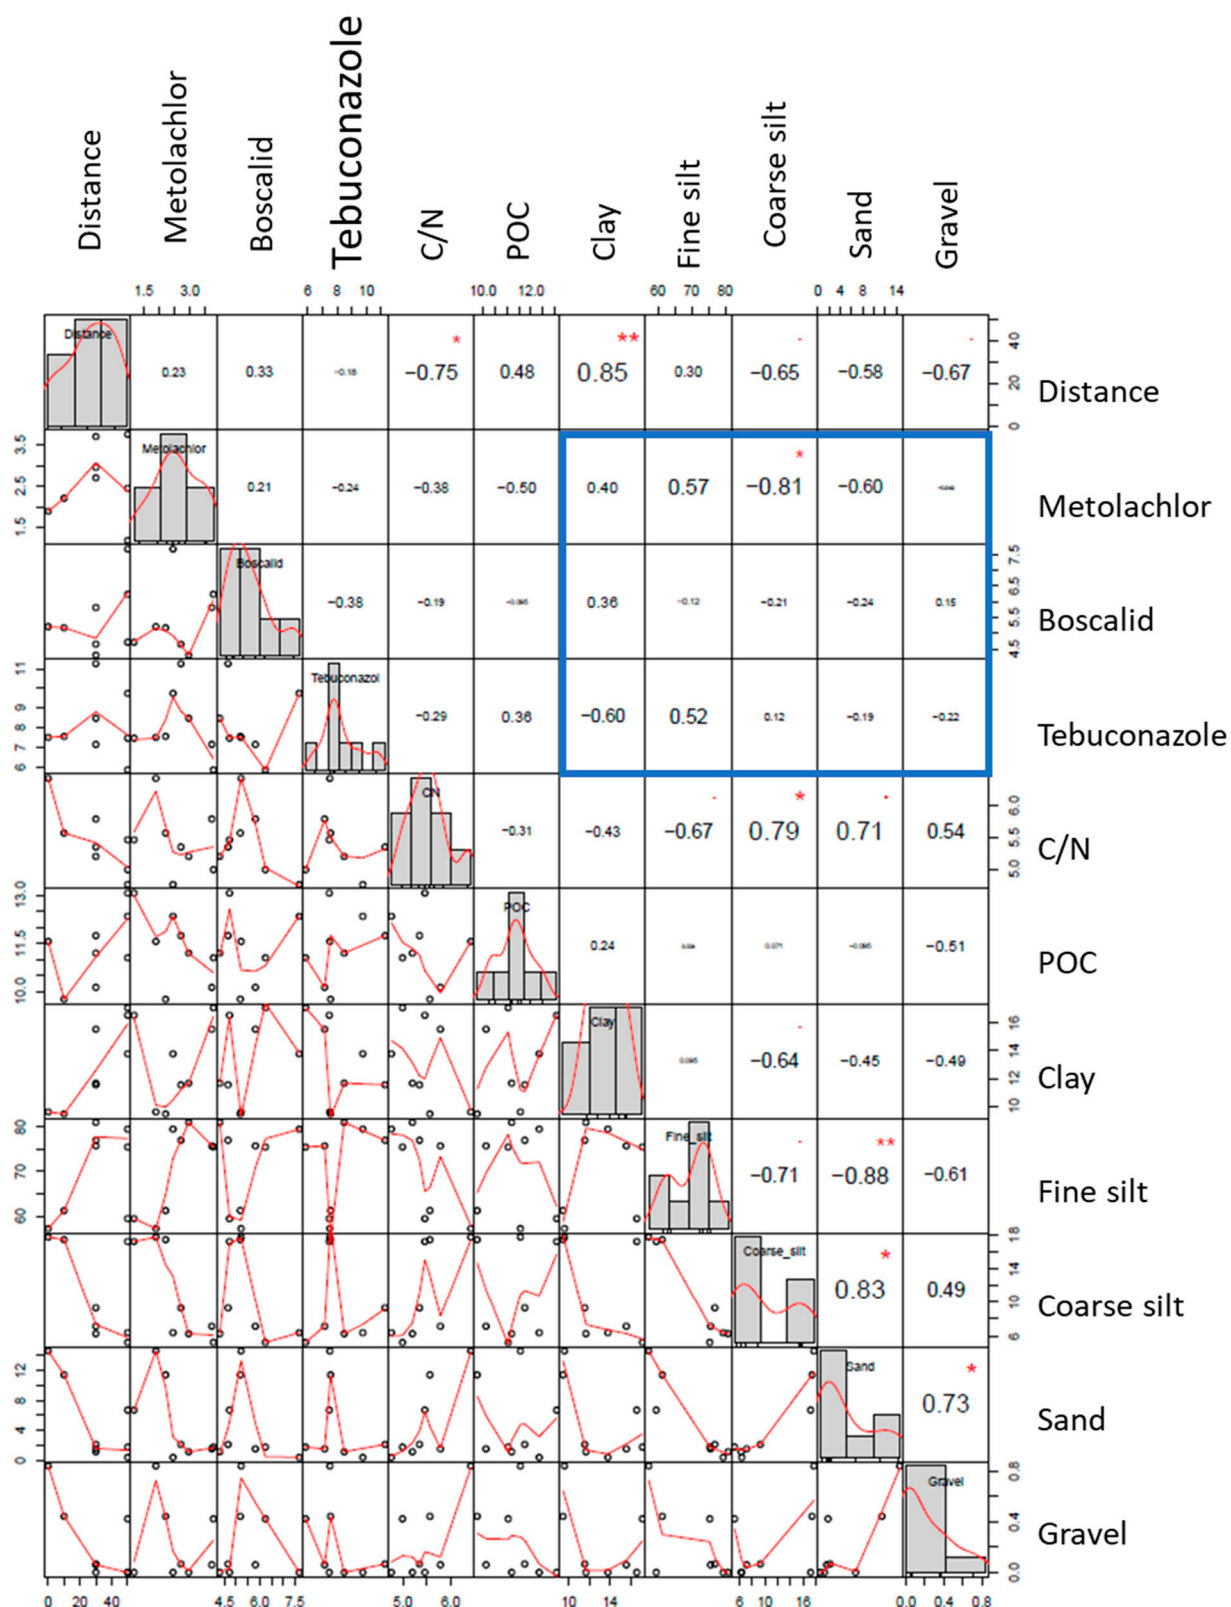

Figure S2: Correlation matrix (Spearman  $r_s$ ) for parameters measured in the sediment samples collected during the autumn campaign at the surface. The upper triangular matrix shows the correlation strength with the significance levels (red stars): no star means not significant, \*  $p$ -value < 0.05, \*\*  $p$ -value < 0.01, \*\*\*  $p$ -value < 0.001. Histograms are kernel density estimation. The lower triangular matrix is composed by the bivariate scatter plots with a fitted smooth line. The  $r_s$  underlined by the blue rectangle refers to the relationships between pesticide content and sediment texture.

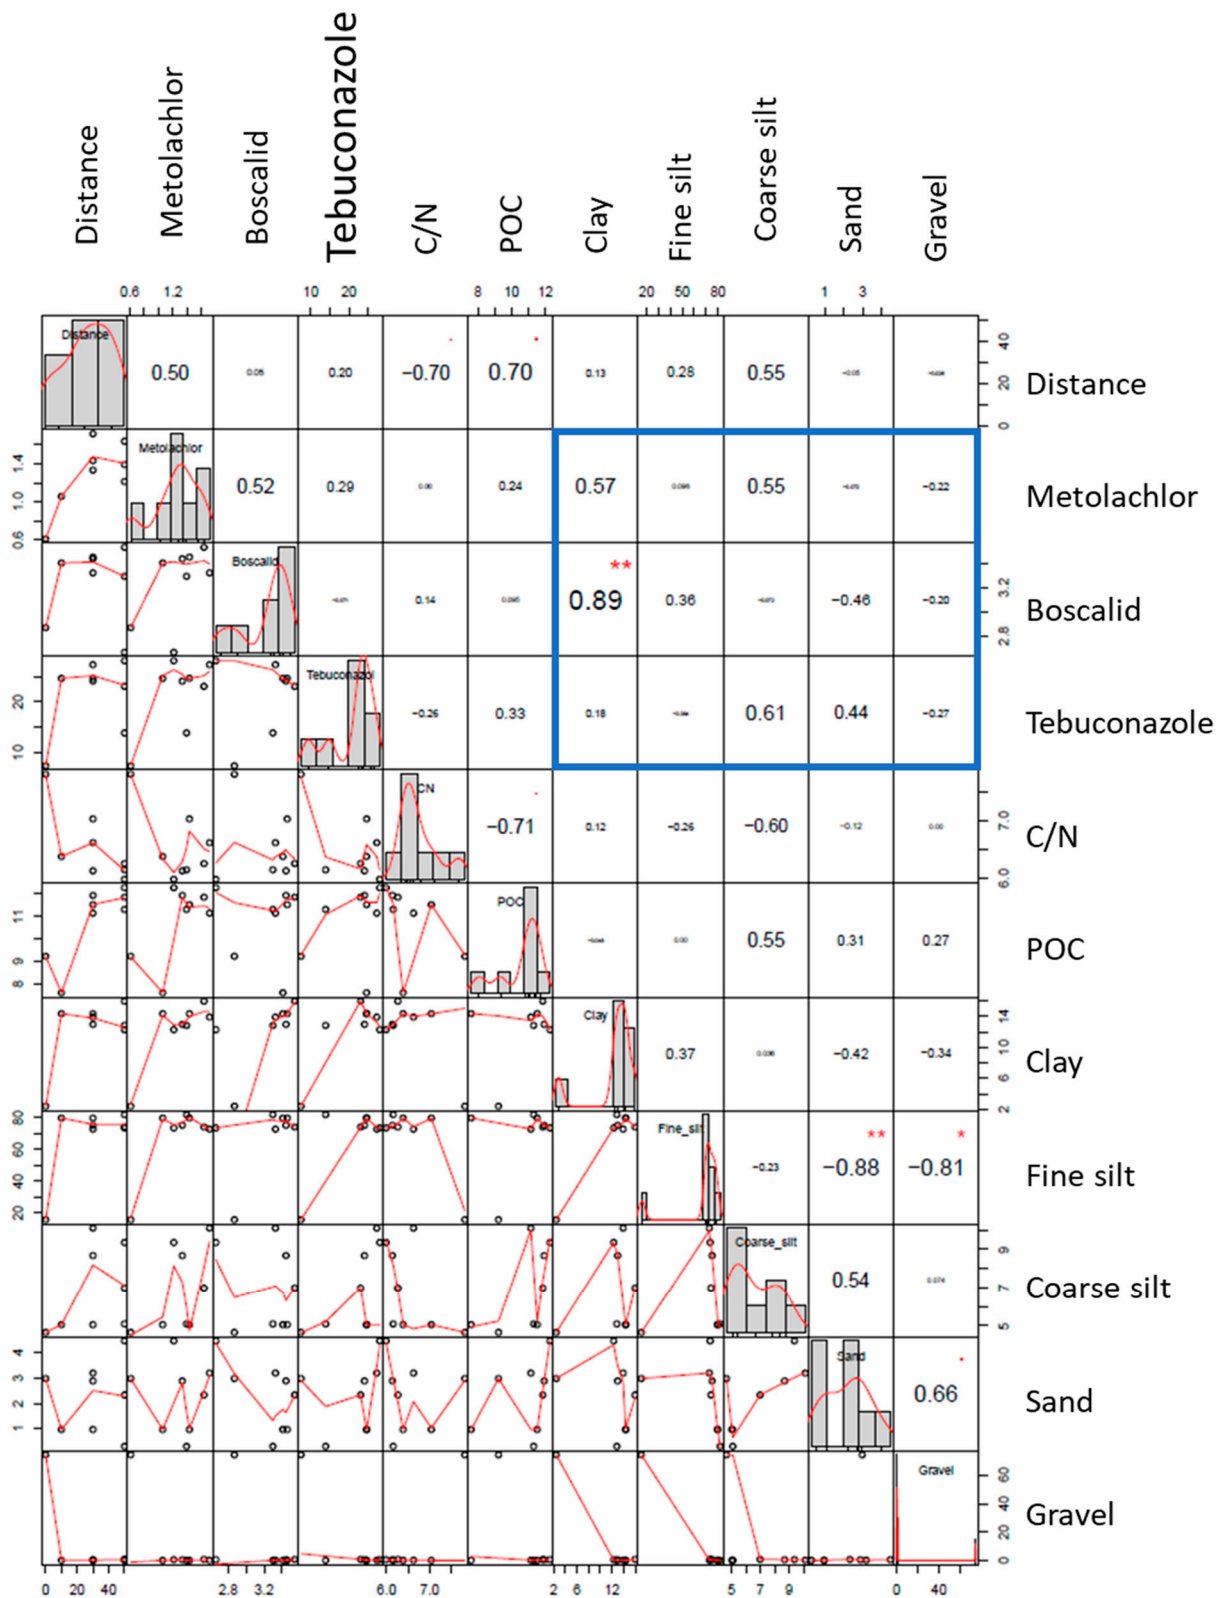

Figure S3: Correlation matrix (Spearman  $r_s$ ) for parameters measured in the sediment samples collected during the summer campaign at the surface. The upper triangular matrix shows the correlation strength with the significance levels (red stars): no star means not significant, \*  $p$ -value  $< 0.05$ , \*\*  $p$ -value  $< 0.01$ , \*\*\*  $p$ -value  $< 0.001$ . Histograms are kernel density estimation. The lower triangular matrix is composed by the bivariate scatter plots with a fitted smooth line. The  $r_s$  underlined by the blue rectangle refers to the relationships between pesticide content and sediment texture.



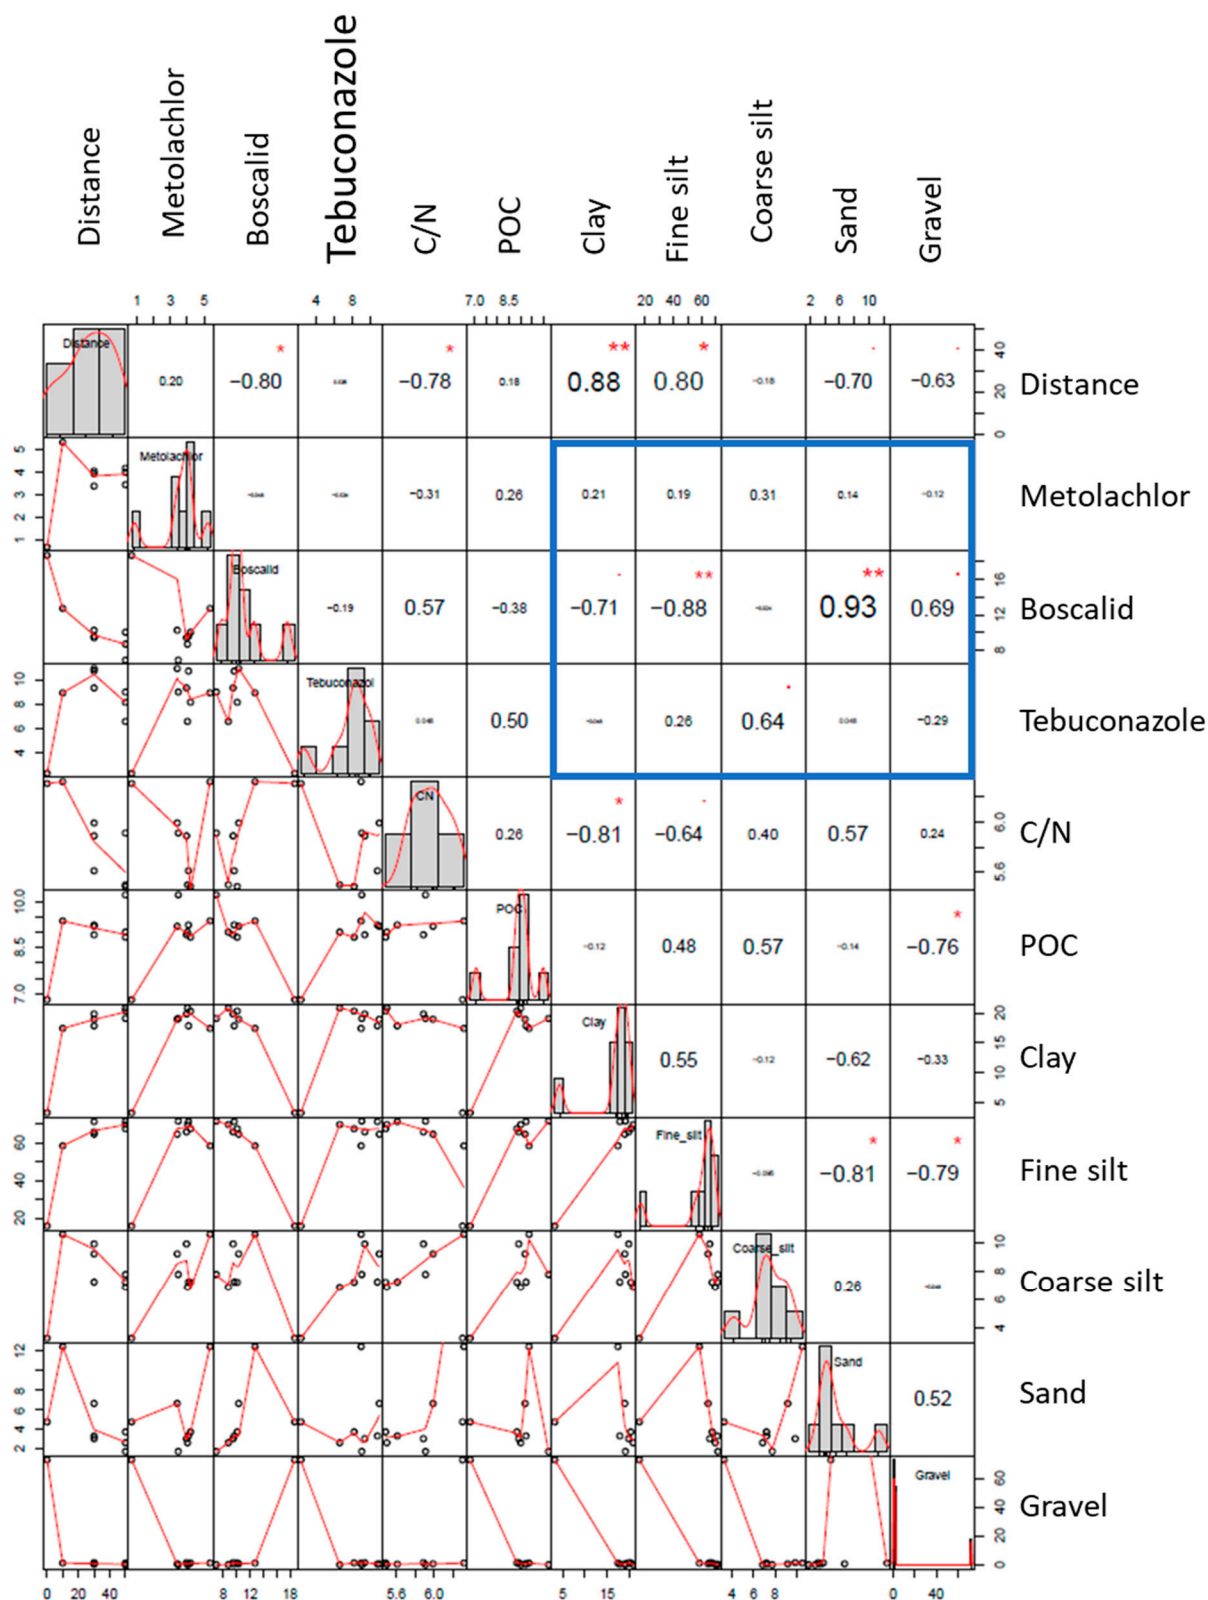

Figure S4: Correlation matrix (Spearman  $r_s$ ) for parameters measured in the sediment samples collected during the summer campaign at the depth. The upper triangular matrix shows the correlation strength with the significance levels (red stars): no star means not significant, \*  $p$ -value < 0.05, \*\*  $p$ -value < 0.01, \*\*\*  $p$ -value < 0.001. Histograms are kernel distribution estimation. The lower triangular matrix is composed by the bivariate scatter plots with a fitted smooth line. The  $r_s$  underlined by the blue rectangle refers to the relationships between pesticide content and sediment texture.
